# Supplementary material
Source: publisher site journal article supplement (https://www.degruyterbrill.com/publication/journal_key/ICOS/downloadAsset/ICOS_ICOS%20Call%20for%20Papers.pdf)
Supplement: Supplementary file 1 [file ICOS_ICOS%20Call%20for%20Papers.pdf]

# ***International Confucian Studies***

## **Call for Papers**

***International Confucian Studies*** is an English-language journal for global readers. It focuses on the study of Confucianism and traditional cultures by scholars worldwide. It aims to support communication and mutual learning among civilizations for upholding cultural diversity. The journal also strives to contribute new thoughts on promoting world peace, common development, and a community of a shared future for mankind. It seeks to serve as an international platform for exchanging ideas in Confucian studies. Research articles and critical reviews in relevant fields are especially welcome. It is published biannually in English and available by instant Gold Open Access. All submissions are subject to a double-blind peer-review process with at least two reviewers.

***International Confucian Studies*** is co-sponsored by International Confucian Association and Beijing Foreign Studies University, and co-published by Walter De Gruyter GmbH and Foreign Language Teaching and Research Press.

***International Confucian Studies*** focuses on international studies of Confucianism and its research scope involves but is not limited to the following topics:

- Confucian classics;
- General theory of Confucianism;
- Confucianism and Western learning;
- Confucianism and literature and art;
- Confucianism and the contemporary world;
- Confucian humanism and social development;
- Review article(s).

### **Editorial Board**

The editorial board consists of 36 distinguished international scholars from relevant specialties and institutions. Over 100 scholars review papers for the journal.

### **Submission Requirements**

- **Research Papers:** No more than 10,000 words for the body (excluding abstract, references and appendixes).
- **Review Articles:** No more than 4,000 words.
- **References:** Following the APA style (7th edition).

## **Journal Website and Contact Information**

**Submission Online:** <https://www.degruyter.com/journal/key/icos/html>

**Email:** icos@fltrp.com

**Address:** Room 2309, No. 19 Xisanhuan Beilu, Beijing, 100089, People's Republic of China

**Tel:** 010-88819461

**BFSU's Academic Journal Network:** <https://www.bfsujournals.com/qbqk/dyzqk/>

## **International Standard Serial Number**

E-ISSN 2751-0166

Editorial Department of  
*International Confucian Studies*  
January 1, 2022

# 《国际儒学研究》

## 征稿启事

《国际儒学研究》是一本面向全球读者的、开放获取的英文学术期刊，聚焦儒家思想和中国传统文化的研究，旨在弘扬中华优秀传统文化、促进人类文明交流与互鉴、维护文化多样性，为促进世界和平与发展、推动人类命运共同体构建提供新思路。本刊力求为全球儒学研究者提供一个良好的交流互动平台，刊登相关研究领域的优秀论文和述评文章，敬请专家、学者赐稿。本刊每年出版两期，所有来稿须经至少两名以上评审专家的双盲同行评审。

本刊由国际儒学联合会和北京外国语大学联合主办，由德古意特出版社和外语教学与研究出版社联合出版，研究范围包括但不限于以下主题：

- 儒学经典；
- 儒学通论；
- 儒学与西学；
- 儒学与文学艺术；
- 儒学与当代世界；
- 儒学人文精神与社会发展；
- 述评等。

### 编辑委员会

本刊编辑委员会由来自相关专业和机构的36位杰出国际学者组成，近百名学者担任本刊外审专家。

## 投稿要求

- 研究性论文：每篇文章字数不超过10,000词。
- 述评论文：每篇文章字数不超过4,000词。
- 参考文献：本刊统一采用APA第七版。

## 本刊网址与联系方式

线上投稿：<https://www.degruyter.com/journal/key/icos/html>

投稿邮箱：[icos@fltrp.com](mailto:icos@fltrp.com)

通信地址：北京市海淀区西三环北路19号外研大厦北楼2309室

联系电话：010-88819461

北外学术期刊网：<https://www.bfsujournals.com/qbqk/dyzqk/>

国际刊号：E-ISSN 2751-0166

《国际儒学研究》编辑部

2022年1月1日
